# Supplementary material
Source: PubMed Central journal article supplement (PMC4423362)
Supplement: 10.1534_115.175919_genetics.115.175919-2.pdf [file 10.1534_115.175919_genetics.115.175919-2.pdf]

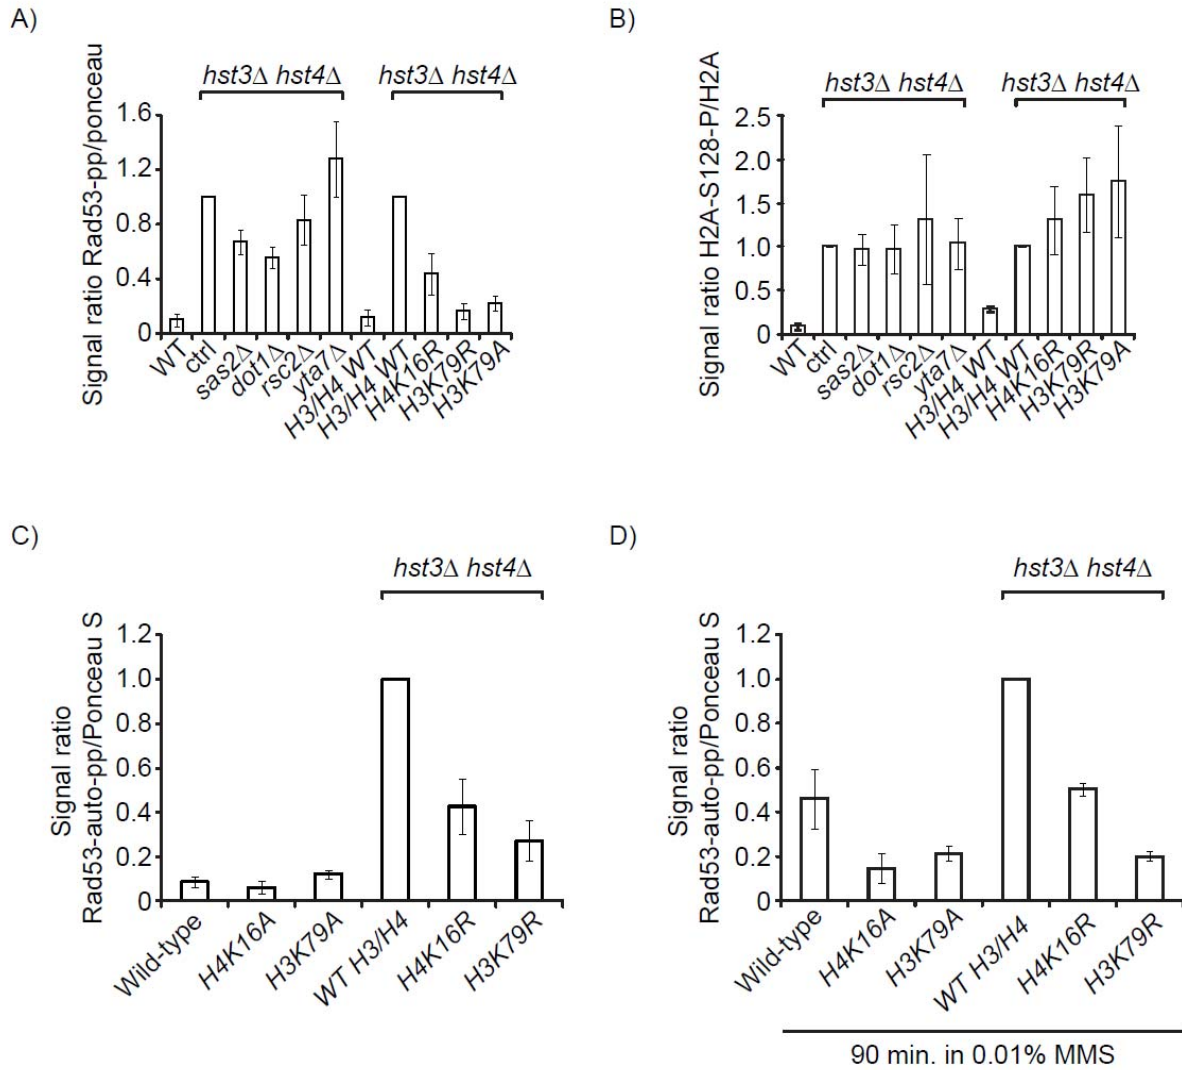

**Figure S2** Densitometry analysis of immunoblots and Rad53 autophosphorylation assays shown in Figure 6B and 6C. A-B) Immunoblot or Rad53 autophosphorylation images from Figure 6B were analyzed by densitometry. Average signals relative to that observed in an isogenic *hst3Δ hst4Δ* strain are shown and error bars indicate the standard error of the mean (from at least 3 independent loadings of each sample).
