# Supplementary material
Source: PubMed Central journal article supplement (PMC4423362)
Supplement: 10.1534_115.175919_genetics.115.175919-4.pdf [file 10.1534_115.175919_genetics.115.175919-4.pdf]

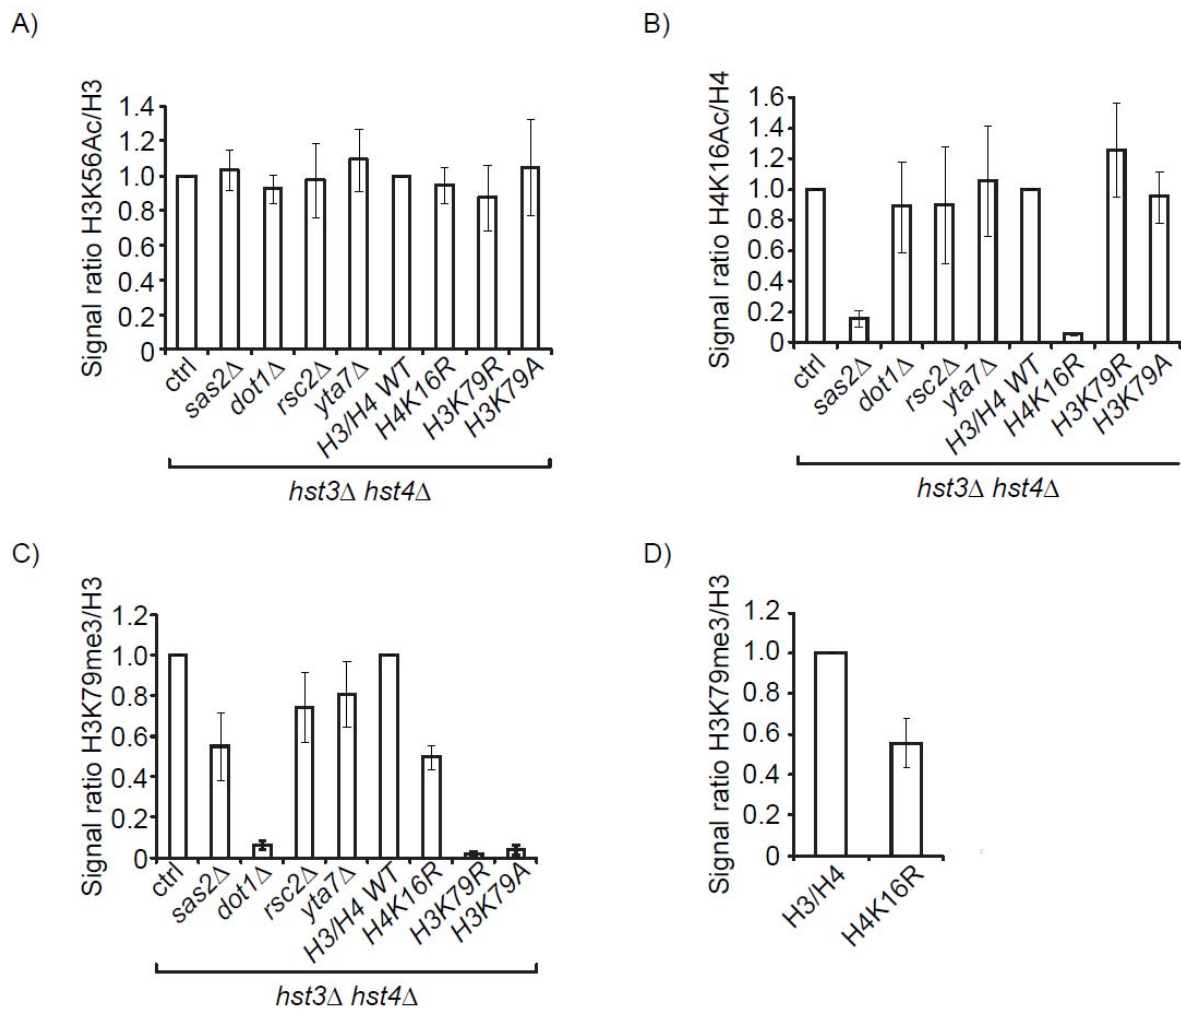

**Figure S1** Densitometry analysis of immunoblots shown in Figure 4D and E. A-C) Immunoblot images from Figure 4D were analyzed by densitometry. Error bars represent the standard error of the mean of between 3 to 12 independent loadings of each sample. D) H3K79me3 immunoblot images from Figure 4E were analyzed by densitometry. Average values relative to the control signal derived from total histone H3 are shown and error bars indicate the standard error of the mean (from 4 independent loading of each sample).
