# Supplementary material
Source: PubMed Central journal article supplement (PMC4423362)
Supplement: 10.1534_115.175919_genetics.115.175919-5.pdf [file 10.1534_115.175919_genetics.115.175919-5.pdf]

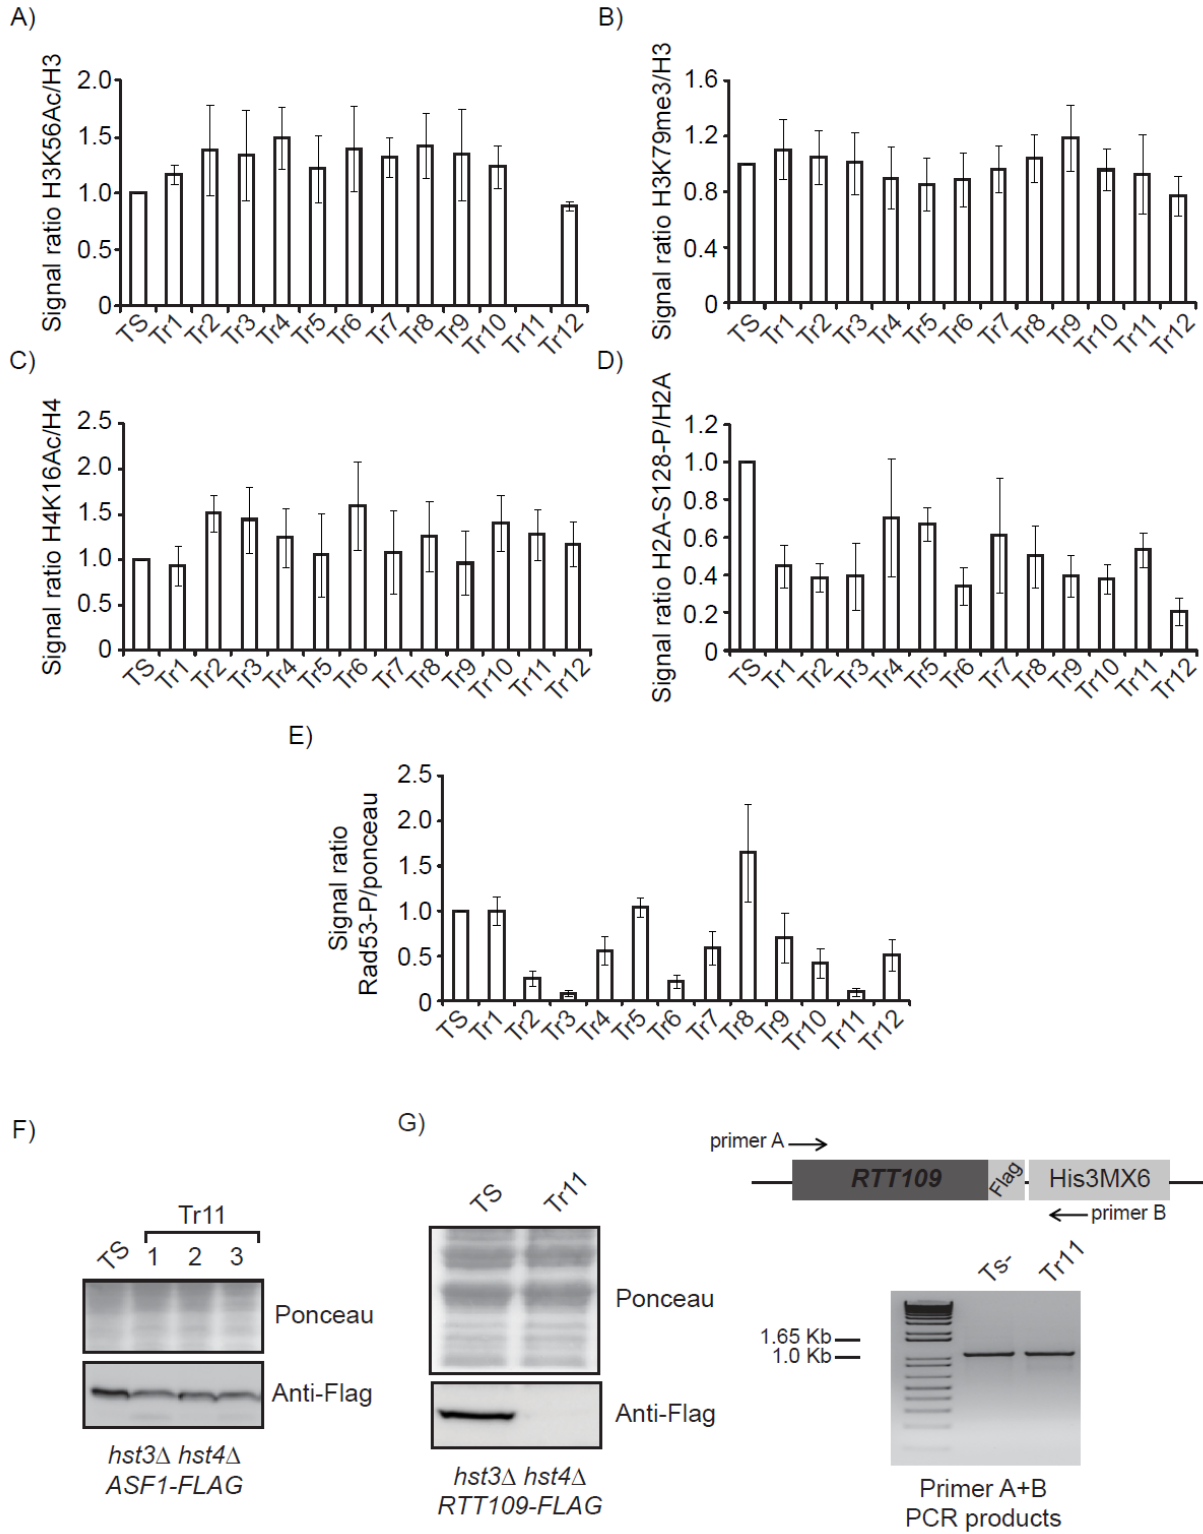

**Figure S3**

**Figure S3** Densitometry analysis of immunoblots and Rad53 autophosphorylation assays shown in Figure 7B. A-E) Immunoblots and Rad53 autophosphorylation images from figure 7B were analyzed by densitometry. The y-axes represent ratio of the signals obtained in each thermo-resistant strain (Tr) relative to the signal observed in the parental *hst3Δ hst4Δ* TS strain. Error bars indicate the standard error of the mean (at least 3 independent loading of each sample). F) Asf1 was epitope-tagged in the *Tr11* thermo-resistant spontaneous suppressor derived from *hst3Δ hst4Δ* Ts- mutant cells. Three independent clones derived from tagging Asf1 in the *Tr11* strain were selected. Immunoblots of whole-cell lysates were probed to detect Asf1-Flag. Ponceau S staining is shown as loading control. G) The Rtt109-Flag protein is not detectable in the *Tr11* spontaneous suppressor of *hst3Δ hst4Δ* that lack H3K56Ac. Rtt109-Flag was detected by immunoblotting in whole-cell lysates of exponentially growing cells probed with a Flag antibody. (Right panel) Location of PCR primers used to ensure that DNA integration correctly resulted in an *RTT109-Flag* gene and PCR results showing that the *RTT109-Flag* gene is present in each of the strains analyzed for Rtt109-Flag protein expression in the left panel.
